# Supplementary material
Source: PubMed Central journal article supplement (PMC2784129)
Supplement: NIHMS150141-supplement-1.pdf [file NIHMS150141-supplement-1.pdf]

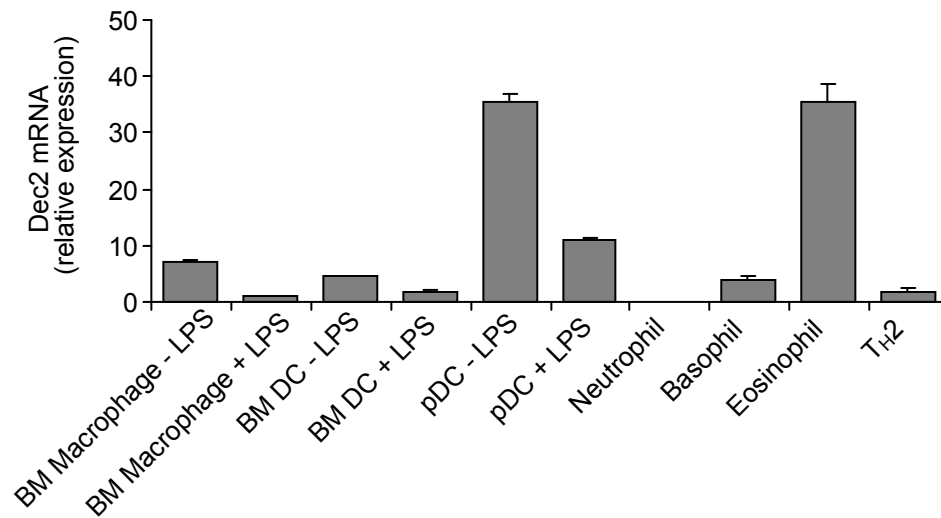

**Supplementary Figure 1. Dec2 expression in various immune cells.** LPS, lipopolysaccharides.

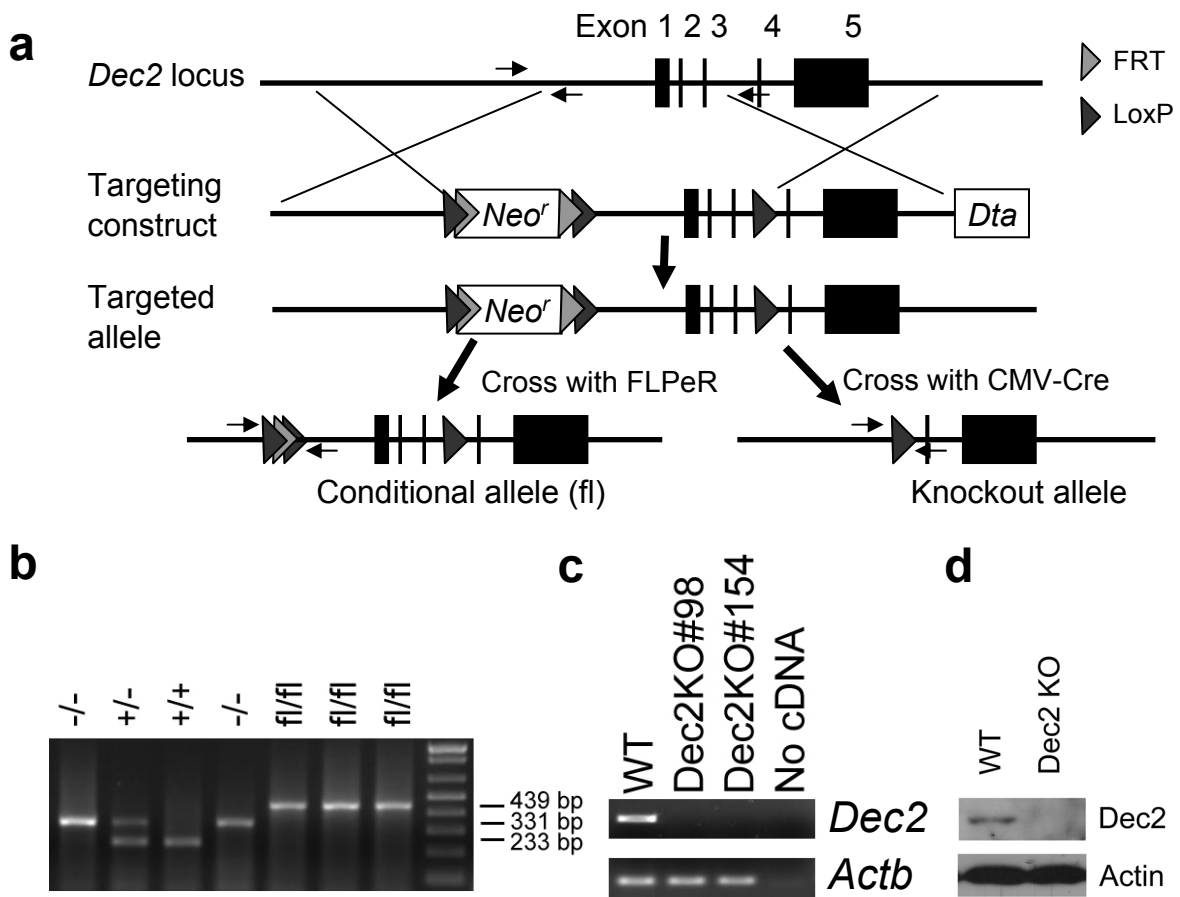

**Supplementary Figure 2. Generation of *Dec2*<sup>-/-</sup> mice.** **a)** Targeting strategy. **b)** Genotyping of +/+, +/-, -/- and floxed fl/fl mice. **c)** *Dec2* mRNA expression in *Dec2*<sup>-/-</sup> mice. RNA was prepared from bone marrow and *Dec2* expression was assessed by RT-PCR. **d)** *Dec2* protein expression in splenocytes was assessed by immunoblot.

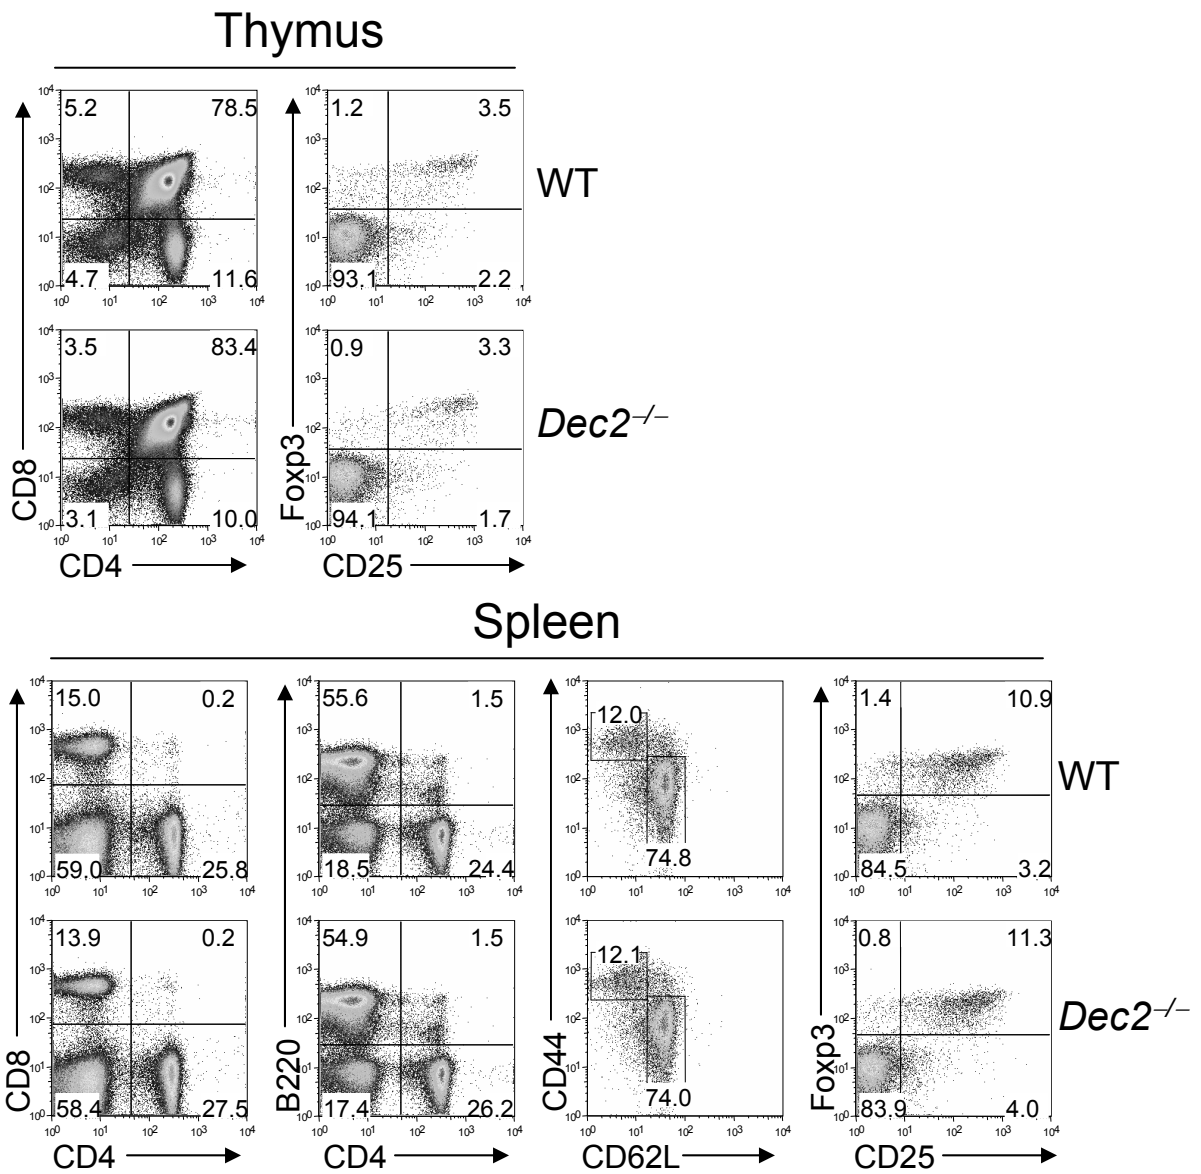

**Supplementary Figure 3. CD4<sup>+</sup> and CD8<sup>+</sup> T cell compartments in thymus and spleen of WT and *Dec2*<sup>-/-</sup> mice.** Data shown are a representative of 4 individual mice in each group with matched age and sex. Numbers in dot plots indicate percentage.

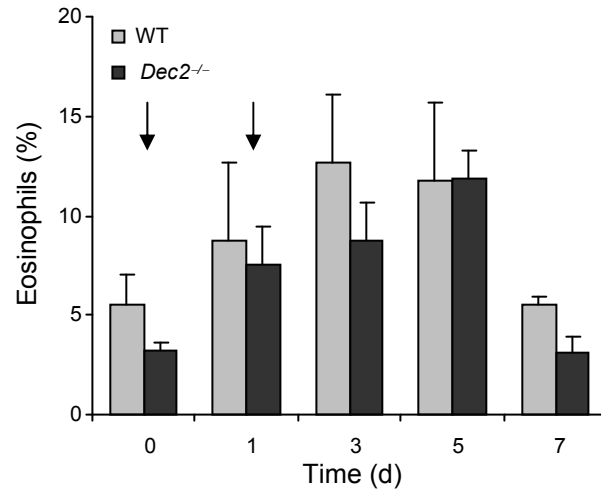

**Supplementary Figure 4. Blood eosinophil release in response to IL-5.** *Dec2*<sup>-/-</sup> and WT mice were injected i.p. on days 0 and 1 with recombinant murine IL-5 (300 ng/mouse, *n* = 3 in each group) and blood eosinophils were evaluated by blood smears with Wright-Giemsa stain at various time points. Data shown are percent of eosinophils among total nucleated cells. Arrow, injection of IL-5.

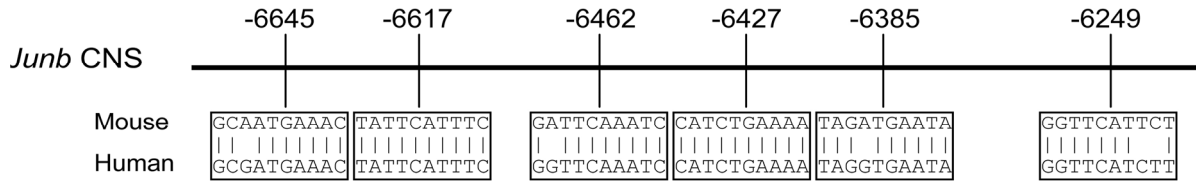

**Supplementary Figure 5. Conserved Dec2 binding sites in the *Junb* conserved non-coding sequence (CNS).** The positions are relative to the *Junb* transcription start site (GenBank Acc. # NM\_008416.1).

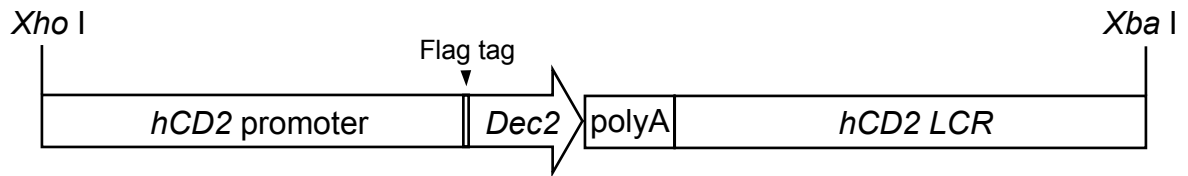

**Supplementary Figure 6. Generation of *CD2-flag-Dec2* transgenic mice.** Flag-*Dec2* cDNA was inserted into *phCD2* containing a human *CD2* mini-locus. The transgene construct was isolated by digestion with *Xho*I and *Xba*I and was microinjected into B6 fertilized oocytes to generate transgenic founders.

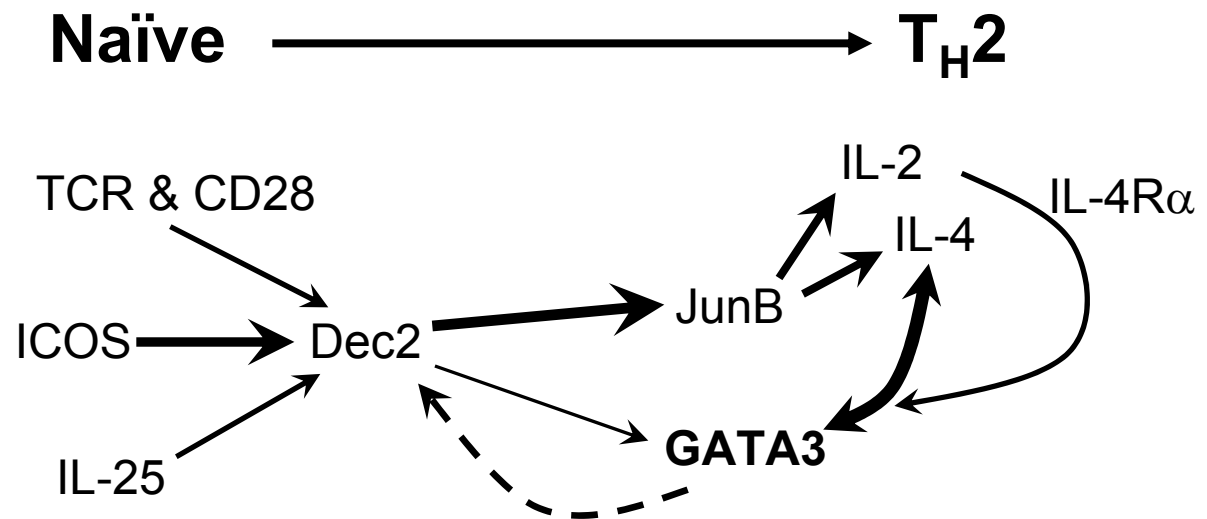

**Supplementary Figure 7. Feed-forward regulation of Th2 differentiation by Dec2.** Induction of gene expression is shown by thickness of the lines. Dotted line indicates indirect effect.
